# Supplementary material for: Can peritumoral regions increase the efficiency of machine-learning prediction of pathological invasiveness in lung adenocarcinoma manifesting as ground-glass nodules?
Source: PubMed Central journal article supplement — J Thorac Dis. 2021 Mar;13(3):1327–37. doi: 10.21037/jtd-20-2981 (PMC8024795; doi:10.21037/jtd-20-2981), 2021-03
Supplement: jtd-13-03-1327-supplementary.pdf [file jtd-13-03-1327-supplementary.pdf]

## Supplementary

**Table S1** Relationship between Peritumoral CT Feature and pathological invasiveness of GGNs

| Peritumoral CT Feature | non-invasive lesions (n=376) | invasive lesions (n=311) | p      |
|------------------------|------------------------------|--------------------------|--------|
| Margin                 |                              |                          | <0.001 |
| Smooth                 | 349                          | 205                      |        |
| Lobular or spiculated  | 30                           | 106                      |        |
| Nodule-lung interface  |                              |                          | 0.035  |
| Well defined           | 312                          | 238                      |        |
| Ill defined            | 64                           | 73                       |        |
| Pleural indentation    |                              |                          | <0.001 |
| Yes                    | 17                           | 60                       |        |
| No                     | 359                          | 251                      |        |
| Peritumoral emphysema  |                              |                          | 0.072  |
| Yes                    | 14                           | 21                       |        |
| No                     | 362                          | 290                      |        |
